# Supplementary material for: Synergizing hole accumulation and transfer on composite Ni/CoOx for photoelectrochemical water oxidation
Source: Royal Society of Chemistry journal article supplement (doi:10.1039/d0cc03717f), 2020-01-01
Supplement: d0cc03717f1.pdf [file d0cc03717f1.pdf]

## Synergizing Hole Accumulation and Transfer on Composite Ni/CoO<sub>x</sub> for Photoelectrochemical Water Oxidation

Wei Wang,<sup>\*a</sup> Marc Heggen,<sup>b</sup> Wei Cui,<sup>c</sup> Benjamin Probst,<sup>c</sup> Roger Alberto<sup>c</sup> and Chunhua Cui,<sup>\*d</sup>

<sup>a</sup> School of Materials and Energy, University of Electronic Science and Technology of China, Chengdu, 610054, China.

<sup>b</sup> Ernst Ruska Center for Microscopy and Spectroscopy with Electrons, Forschungszentrum Juelich GmbH, 52425 Juelich, Germany.

<sup>c</sup> Department of Chemistry, University of Zurich, Winterthurerstr. 190, CH-8057 Zurich, Switzerland.

<sup>d</sup> Molecular Electrochemistry Laboratory, Institute of Fundamental and Frontier Sciences, University of Electronic Science and Technology of China, Chengdu, 610054, China.

\* Correspondence: wei.wang@uestc.edu.cn (W.W.); chunhua.cui@uestc.edu.cn (C.C.)

### Materials and Methods

A nanostructured hematite was used as a model support for catalyst deposition. Firstly, the  $\beta$ -FeOOH nanorods were synthesized by a hydrothermal deposition onto the F-doped SnO<sub>2</sub> glass (FTO, TEC 15A 3.0 mm, XOP Física glass company) in a solution containing 0.15 M FeCl<sub>3</sub>·6H<sub>2</sub>O (Sigma-Aldrich) and 1.0 M NaNO<sub>3</sub> (Sigma-Aldrich) at 95 °C for 1.5 hours. Then this hematite substrate has been annealed in air at 600 °C for 2 hours. Transient electro-reduction of Ni (NiCl<sub>2</sub>·6H<sub>2</sub>O, General-reagent) and Co ions (CoCl<sub>2</sub>·6H<sub>2</sub>O, General-reagent) in the electrolyte (pH=4) containing 0.1 M metal ions at -1.1 V versus Ag/AgCl with a charge density of 0.20 mC cm<sup>-2</sup> for H2T-NiO<sub>x</sub> and H2T-CoO<sub>x</sub>, respectively. For the synthesis of H2T-NiCoO<sub>x</sub>, Ni and Co with a charge density of 0.20 mC cm<sup>-2</sup> was successively deposited. Several parallel samples were prepared and tested to confirm the repeatability.

TiO<sub>x</sub> was prepared on hematite using an atomic layer deposition system at 120°C (PICSUN R-200). Tetrakis(dimethylamido)-titanium(IV) (99.999%, Sigma-Aldrich, kept at 85°C) and H<sub>2</sub>O were used as Ti and O sources, respectively. Ti precursor was kept in the chamber for 1.6 seconds under 150 sccm N<sub>2</sub> flow, followed by a 6-second N<sub>2</sub> purge. H<sub>2</sub>O was kept for 0.1 seconds under 200 sccm N<sub>2</sub> flow, followed by a 6-second N<sub>2</sub> purge. TiO<sub>x</sub> deposition has been calculated to be 0.50 Å per cycle.

A field emission scanning electron microscope (SEM Zeiss Supra 50 VP) was applied to characterize the surface morphology and surface texture. Compositional maps were acquired with the energy-dispersive X-ray spectroscopy (EDX).

The related electrochemical measurements were implemented by using an SP-300 Potentiostat, Bio-logic. All measurements were carried out in a 1.0 M NaOH alkaline electrolyte in a custom-designed Cappuccino Teflon cell with a quartz window.

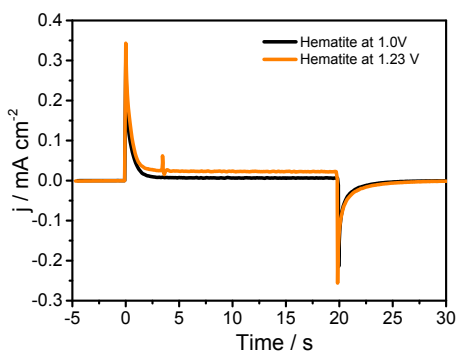

Figure S1. Transient photocurrent response of hematite under chopped light.

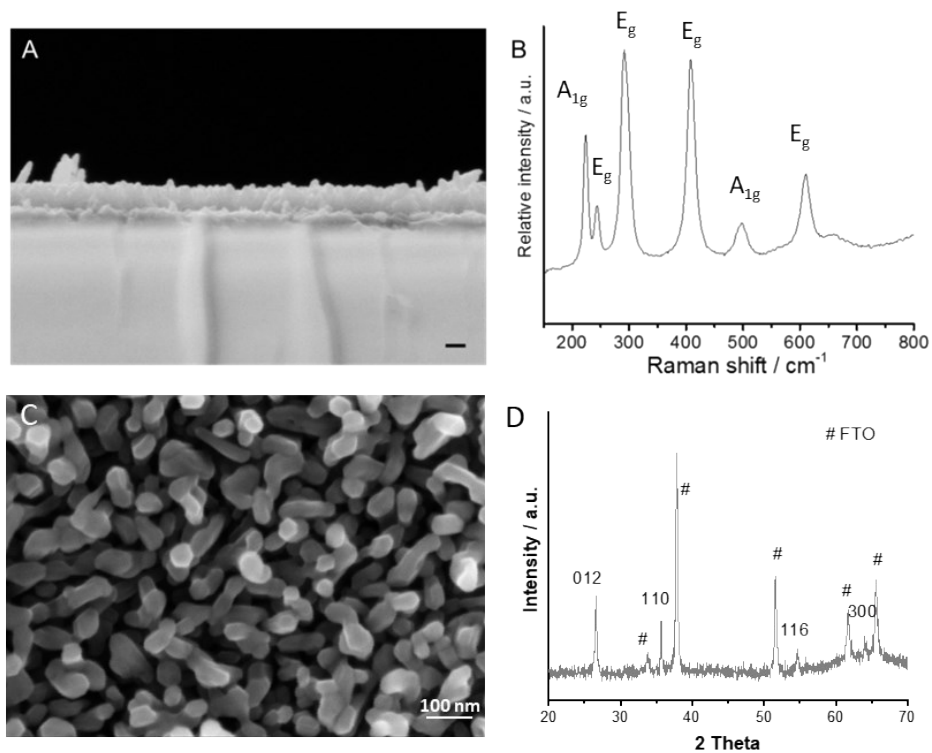

Figure S2. A, C) TEM image of cross-section and surface morphology of H<sub>2</sub>T (scale bar 100 nm), B) Raman and D) XRD of H<sub>2</sub>T.

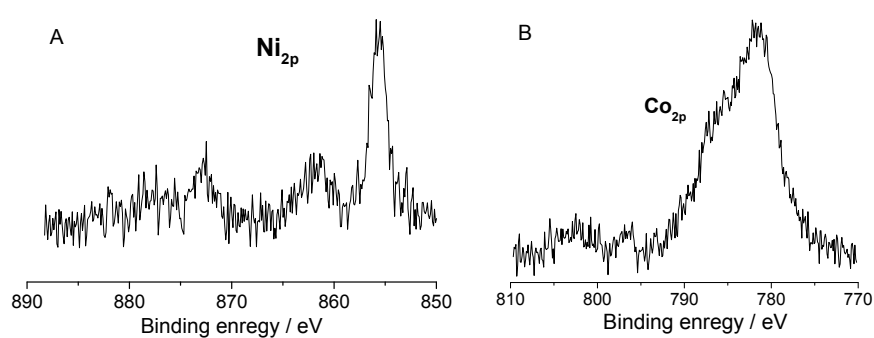

Figure S3. X-Ray Photoelectron Spectroscopy (XPS) plots after background subtraction show the formation of A) NiO<sub>x</sub> and B) CoO<sub>x</sub> in air.

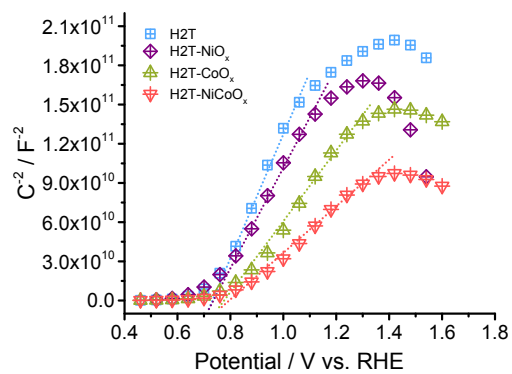

Figure S4. Mott–Schottky plots of H2T, H2T-NiO<sub>x</sub>, H2T-CoO<sub>x</sub> and H2T-Ni/CoO<sub>x</sub> collected at 1 kHz in the dark. The slope of the Mott–Schottky plots,  $\text{slope} = \frac{D_N e \epsilon \epsilon_0}{2}$ , are used to evaluate the donor density  $D_N$ , meaning lower slope, higher donor density.

1. F. Fabregat-Santiago, G. Garcia-Belmonte, J. Bisquert, P. Bogdanoff and A. Zaban, *J. Electrochem. Soc.*, 2003, **150**, E293-E298.
